# Supplementary material for: Advances in immunotherapy for glioblastoma multiforme
Source: PubMed Central journal article supplement (PMC9597698; doi:10.3389/fimmu.2022.944452), 2022-10-12
Supplement: DataSheet_1.pdf [file DataSheet_1.pdf]

**Supplementary Table 1.** Clinical trials of checkpoint inhibitors for the treatment of GBM.

| Trial Number | Phase     | Immune Checkpoint     | Interventions                                                                                                                                                                 | Status                 |
|--------------|-----------|-----------------------|-------------------------------------------------------------------------------------------------------------------------------------------------------------------------------|------------------------|
| 1            | III       | PD-1                  | Drug: Nivolumab<br>Drug: Temozolomide<br>Radiation: Radiotherapy<br>Other: Nivolumab Placebo                                                                                  | Active, not recruiting |
| 2            | III       | PD-1                  | Drug: Nivolumab<br>Drug: Temozolomide<br>Radiation: Radiotherapy                                                                                                              | Active, not recruiting |
| 3            | III       | PD-1<br>CTLA-4        | Biological: Nivolumab<br>Biological: Bevacizumab<br>Biological: Ipilimumab                                                                                                    | Active, not recruiting |
| 4            | II<br>III | CTLA-4<br>PD-1        | Biological: Ipilimumab<br>Biological: Nivolumab<br>Radiation: Radiation Therapy<br>Drug: Temozolomide                                                                         | Recruiting             |
| 5            | II        | PD-1                  | Biological: PVSRIPO,<br>Biological: Pembrolizumab                                                                                                                             | Recruiting             |
| 6            | II        | PD-1                  | Drug: Nivolumab,<br>Drug: Bevacizumab                                                                                                                                         | Recruiting             |
| 7            | II        | PD-L1                 | Biological: Avelumab                                                                                                                                                          | Active, not recruiting |
| 8            | II        | PD-1                  | Biological: DNX-2401,<br>Biological: Pembrolizumab                                                                                                                            | Active, not recruiting |
| 9            | II        | PD-1                  | Biological: autologous dendritic cells pulsed with tumor lysate antigen Vaccine,<br>Biological: Nivolumab,                                                                    | Withdrawn              |
| 10           | II        | IDO                   | Drug: Indoximod,<br>Radiation: Partial Radiation,<br>Radiation: Full-dose Radiation,<br>Drug: Temozolomide,<br>Drug: Cyclophosphamide,<br>Drug: Etoposide,<br>Drug: Lomustine | Recruiting             |
| 11           | II        | PD-L1<br>CTLA-4       | Biological: Durvalumab<br>Procedure: Surgical Procedure<br>Biological: Tremelimumab                                                                                           | Active, not recruiting |
| 12           | II        | CTLA-4<br>PD-1        | Biological: Ipilimumab<br>Biological: Nivolumab                                                                                                                               | Recruiting             |
| 13           | II        | PD-1                  | Drug: Camrelizumab<br>Radiation: radiation<br>Drug: Temozolomide                                                                                                              | Recruiting             |
| 14           | II        | Anti-GITR<br>Anti-PD1 | Drug: INCMGA00012<br>Drug: INCAGN01876<br>Drug: SRS<br>Procedure: Brain surgery                                                                                               | Recruiting             |
| 15           | II        | PD-1                  | Drug: Nivolumab                                                                                                                                                               | Completed              |
| 16           | II        | PD-1                  | Drug: Pembrolizumab                                                                                                                                                           | Recruiting             |
| 17           | II        | PD-L1                 | Drug: Axitinib<br>Drug: Avelumab                                                                                                                                              | Completed              |
| 18           | I<br>II   | PD-L1                 | Radiation: Hypofractionated stereotactic radiation therapy<br>Drug: Durvalumab                                                                                                | Recruiting             |

|    |             |         |                                |                                                                                                                                                                                          |                           |
|----|-------------|---------|--------------------------------|------------------------------------------------------------------------------------------------------------------------------------------------------------------------------------------|---------------------------|
| 19 | NCT04077866 | I<br>II | B7-H3                          | Drug: Temozolomide,<br>Biological: B7-H3 CAR-T                                                                                                                                           | Recruiting                |
| 20 | NCT03277638 | I<br>II | PD-1                           | Drug: Pembrolizumab at 7 days prior,<br>Drug: Pembrolizumab at 14 days post,<br>Drug: Pembrolizumab at 35 days post,<br>Procedure: Laser Interstitial Thermotherapy                      | Recruiting                |
| 21 | NCT03750071 | I<br>II | PD-L1                          | Biological: VXM01,<br>Biological: Avelumab                                                                                                                                               | Recruiting                |
| 22 | NCT03491683 | I<br>II | PD-1                           | Biological: INO-5401,<br>Biological: INO-9012,<br>Biological: Cemiplimab,<br>Radiation: Radiation Therapy,<br>Drug: Temozolomide                                                         | Active, not<br>recruiting |
| 23 | NCT04116658 | I<br>II | PD-1                           | Biological: Multiple dose of EO2401 in<br>combination with nivolumab                                                                                                                     | Recruiting                |
| 24 | NCT02052648 | I<br>II | IDO                            | Drug: Indoximod,<br>Drug: Temozolomide,<br>Drug: Bevacizumab,<br>Radiation: Stereotactic Radiation                                                                                       | Completed                 |
| 25 | NCT03347097 | Early I | PD-1                           | Drug: TIL<br>Drug: PD1-TIL                                                                                                                                                               | Recruiting                |
| 26 | NCT03707457 | I       | PD-1<br>GITR<br>IDO1<br>CTLA-4 | Drug: Nivolumab,<br>Drug: Anti-GITR Monoclonal Antibody MK-<br>4166,<br>Drug: IDO1 inhibitor INCB024360,<br>Drug: Ipilimumab                                                             | Terminated                |
| 27 | NCT03726515 | I       | PD-1                           | Biological: CART-EGFRvIII T cells<br>Biological: Pembrolizumab                                                                                                                           | Active, not<br>recruiting |
| 28 | NCT04003649 | I       | CTLA-4<br>PD-1                 | Biological: IL13Ralpha2-specific Hinge-<br>optimized 4-1BB-co-stimulatory<br>CAR/Truncated CD19-expressing Autologous<br>TN/MEM Cells<br>Biological: Ipilimumab<br>Biological: Nivolumab | Recruiting                |
| 29 | NCT03341806 | I       | PD-L1                          | Drug: Avelumab<br>Combination Product: MRI-guided LITT<br>therapy<br>Biological: Dendritic Cell Tumor Cell Lysate<br>Vaccine                                                             | Recruiting                |
| 30 | NCT04201873 | I       | PD-1                           | Biological: Pembrolizumab<br>Drug: Poly ICLC                                                                                                                                             | Recruiting                |
| 31 | NCT02311920 | I       | CTLA-4<br>PD-1                 | Biological: Ipilimumab<br>Biological: Nivolumab<br>Drug: Temozolomide                                                                                                                    | Active, not<br>recruiting |
| 32 | NCT04606316 | I       | PD-1<br>CTLA-4                 | Drug: Nivolumab-Placebo<br>Drug: Nivolumab<br>Drug: Ipilimumab-Placebo<br>Drug: Ipilimumab<br>Procedure: Surgery                                                                         | Recruiting                |
| 33 | NCT03233152 | I       | CTLA-4<br>PD-1                 | Drug: Ipilimumab (YervoyTM, 50 mg/10 mL<br>solution)<br>Drug: Nivolumab (OpdivoTM, 40 mg/4mL<br>solution)                                                                                | Recruiting                |
| 34 | NCT03961971 | I       | Tim-3<br>PD-1                  | Drug: MBG453                                                                                                                                                                             | Recruiting                |

|    |             |         |                                      |                                                                                                                                                     |                           |
|----|-------------|---------|--------------------------------------|-----------------------------------------------------------------------------------------------------------------------------------------------------|---------------------------|
| 35 | NCT02658981 | I       | LAG-3<br>PD-1<br>TNFRSF9/(C<br>D137) | Biological: Anti-LAG-3 Monoclonal Antibody<br>BMS 986016,<br>Biological: Anti-PD-1,<br>Biological: Anti-CD137                                       | Active, not<br>recruiting |
| 36 | NCT03493932 | I       | PD-1<br>LAG-3                        | Drug: Nivolumab,<br>Drug: BMS-986016                                                                                                                | Recruiting                |
| 37 | NCT04656535 | I       | PD-1<br>TIGIT                        | Drug: AB122,<br>Drug: AB154,<br>Drug: Placebo                                                                                                       | Not yet<br>recruiting     |
| 38 | NCT04385173 | I       | B7-H3                                | Drug: B7-H3 CAR-T,<br>Drug: Temozolomide                                                                                                            | Recruiting                |
| 39 | NCT03576612 | I       | PD-1                                 | Biological: AdV-tk,<br>Drug: Valacyclovir,<br>Radiation: Radiation,<br>Drug: Temozolomide,<br>Biological: Nivolumab,                                | Recruiting                |
| 40 | NCT04047706 | I       | PD-1                                 | Biological: IDO1 Inhibitor BMS-986205,<br>Biological: Nivolumab,<br>Radiation: Radiation Therapy,<br>Drug: Temozolomide                             | Recruiting                |
| 41 | NCT02502708 | I       | IDO                                  | Drug: Indoximod,<br>Drug: Temozolomide,<br>Radiation: Conformal Radiation,<br>Drug: Cyclophosphamide,<br>Drug: Etoposide                            | Completed                 |
| 42 | NCT02852655 | I       | PD-1                                 | Drug: Pembrolizumab (MK-3475)                                                                                                                       | Recruiting                |
| 43 | NCT03422094 | I       | PD-1<br>CTLA-4                       | Biological: NeoVax,<br>Biological: Nivolumab<br>Biological: Ipilimumab,<br>Procedure: Research blood draw, Procedure:<br>Leukapheresis for research | Terminated                |
| 44 | NCT02937844 | I       | PD-L1                                | Biological: Anti-PD-L1 CSR T cells, Drug:<br>Cyclophosphamide,<br>Drug: Fludarabine                                                                 | Unknown<br>status         |
| 45 | NCT03661723 | II      | PD-1                                 | Drug: Pembrolizumab<br>Drug: Bevacizumab Radiation: Re-irradiation                                                                                  | Recruiting                |
| 46 | NCT04118036 | II      | PD-1                                 | Drug: Pembrolizumab<br>Drug: Abemaciclib                                                                                                            | Suspended                 |
| 47 | NCT03722342 | I       | PD-1                                 | Drug: TTAC-0001 and pembrolizumab<br>combination                                                                                                    | Active, not<br>recruiting |
| 48 | NCT03405792 | II      | PD-1                                 | Drug: Temozolomide (TMZ)<br>Device: Optune System<br>Drug: Pembrolizumab                                                                            | Recruiting                |
| 49 | NCT02530502 | I       | PD-1                                 | Other: Laboratory Biomarker Analysis<br>Biological: Pembrolizumab<br>Radiation: Radiation Therapy<br>Drug: Temozolomide                             | Terminated                |
| 50 | NCT02430363 | I<br>II | PD-1                                 | Drug: MK – 3475<br>Biological: Suppressor of the PI3K/Akt<br>pathways                                                                               | Unknown<br>status         |
| 51 | NCT03018288 | II      | PD-1                                 | Drug: Pembrolizumab Biological: HSPPC-96<br>Drug: Temozolomide<br>Other: Placebo                                                                    | Recruiting                |
| 52 | NCT03347617 | II      | PD-1                                 | Drug: Ferumoxytol<br>Other: Laboratory Biomarker Analysis<br>Procedure: Magnetic Resonance Imaging                                                  | Recruiting                |

| Biological: Pembrolizumab |             |         |              |                                                                                                                                                                                                                      |                        |
|---------------------------|-------------|---------|--------------|----------------------------------------------------------------------------------------------------------------------------------------------------------------------------------------------------------------------|------------------------|
| 53                        | NCT03665545 | I<br>II | PD-1         | Drug: IMA950/Poly-ICLC and pembrolizumab                                                                                                                                                                             | Recruiting             |
| 54                        | NCT04013672 | II      | PD-1         | Drug: Pembrolizumab<br>Drug: SurVaxM<br>Drug: Sargramostim<br>Drug: Montanide ISA 51                                                                                                                                 | Recruiting             |
| 55                        | NCT02337491 | II      | PD-1         | Drug: Pembrolizumab<br>Drug: Bevacizumab                                                                                                                                                                             | Completed              |
| 56                        | NCT02337686 | II      | PD-1         | Other: Laboratory Biomarker Analysis<br>Biological: Pembrolizumab<br>Other: Pharmacological Study<br>Procedure: Therapeutic Conventional Surgery                                                                     | Active, not recruiting |
| 57                        | NCT03426891 | I       | PD-1         | Drug: Pembrolizumab<br>Drug: Vorinostat<br>Drug: Temozolomide<br>Radiation: Radiotherapy                                                                                                                             | Recruiting             |
| 58                        | NCT03197506 | II      | PD-1         | Radiation: External Beam Radiation Therapy<br>Other: Laboratory Biomarker Analysis<br>Biological: Pembrolizumab<br>Radiation: Radiation Therapy<br>Drug: Temozolomide<br>Procedure: Therapeutic Conventional Surgery | Recruiting             |
| 59                        | NCT02287428 | I       | PD-1         | Radiation: Radiation Therapy<br>Biological: Personalized NeoAntigen Vaccine<br>Drug: Pembrolizumab<br>Drug: Temozolomide                                                                                             | Recruiting             |
| 60                        | NCT03311542 |         | PD-1         | Biological: pembrolizumab                                                                                                                                                                                            | No longer available    |
| 61                        | NCT03797326 | II      | PD-1         | Biological: Pembrolizumab<br>Drug: Lenvatinib                                                                                                                                                                        | Recruiting             |
| 62                        | NCT01174121 | II      | PD-1         | Biological: Young TIL<br>Drug: Aldesleukin<br>Drug: Cyclophosphamide<br>Drug: Fludarabine<br>Drug: Pembrolizumab (Keytruda)                                                                                          | Suspended              |
| 63                        | NCT04429542 | I       | PD-1         | Drug: BCA101<br>Drug: Pembrolizumab                                                                                                                                                                                  | Recruiting             |
| 64                        | NCT03636477 | I       | PD-1         | Biological: Ad-RTS-hIL-12<br>Drug: Veledimex<br>Drug: Nivolumab                                                                                                                                                      | Active, not recruiting |
| 65                        | NCT02648633 | I       | PD-1         | Radiation: Stereotactic Radiosurgery<br>Drug: Nivolumab<br>Drug: Valproate                                                                                                                                           | Terminated             |
| 66                        | NCT03430791 | II      | CTLA-4, PD-1 | Drug: Nivolumab 240 mg IV<br>Drug: Nivolumab 3 mg/kg<br>Drug: Ipilimumab 1 mg/kg<br>Device: NovoTTF200A (Optune)                                                                                                     | Active, not recruiting |
| 67                        | NCT03452579 | II      | PD-1         | Drug: Nivolumab<br>Drug: Standard Dose Bevacizumab<br>Drug: Reduced Dose Bevacizumab                                                                                                                                 | Active, not recruiting |
| 68                        | NCT04195139 | II      | PD-1         | Drug: Nivolumab<br>Drug: Temozolomide                                                                                                                                                                                | Recruiting             |
| 69                        | NCT03743662 | II      | PD-1         | Radiation: Re-irradiation (RT)                                                                                                                                                                                       | Recruiting             |

|    |             |         |                |                                                                                                                                                             |                        |
|----|-------------|---------|----------------|-------------------------------------------------------------------------------------------------------------------------------------------------------------|------------------------|
|    |             |         |                | Drug: Bevacizumab<br>Drug: Nivolumab<br>Procedure: Re-resection                                                                                             |                        |
| 70 | NCT03367715 | II      | CTLA-4, PD-1   | Drug: Nivolumab<br>Drug: Ipilimumab<br>Radiation: Radiation Therapy (RT)                                                                                    | Recruiting             |
| 71 | NCT02529072 | I       | PD-1           | Drug: nivolumab<br>Biological: DC                                                                                                                           | Completed              |
| 72 | NCT03718767 | II      | PD-1           | Drug: Nivolumab                                                                                                                                             | Recruiting             |
| 73 | NCT02327078 | I<br>II | PD-1           | Drug: Nivolumab (Phase 1)<br>Drug: Epacadostat (Phase 1)<br>Drug: Chemotherapy (Phase 1)<br>Drug: Nivolumab (Phase 2)<br>Drug: Epacadostat (Phase 2)        | Completed              |
| 74 | NCT04323046 | I       | CTLA-4<br>PD-1 | Biological: Ipilimumab<br>Biological: Nivolumab<br>Drug: Placebo Administration<br>Other: Quality-of-Life Assessment<br>Other: Questionnaire Administration | Recruiting             |
| 75 | NCT02335918 | I<br>II | PD-1           | Drug: Combination of varlilumab and nivolumab                                                                                                               | Completed              |
| 76 | NCT03879512 | I<br>II | CTLA-4<br>PD-1 | Drug: depletion of regulatory T cells<br>Procedure: reoperation<br>Biological: cancer vaccine<br>Biological: checkpoint blockade<br>Nivolumab/Ipilimumab    | Recruiting             |
| 77 | NCT03684811 | I<br>II | PD-1           | Drug: FT-2102<br>Drug: Azacitidine<br>Biological: Nivolumab<br>Drug: Gemcitabine and Cisplatin                                                              | Active, not recruiting |
| 78 | NCT04704154 | II      | PD-1           | Drug: Regorafenib, (Stivarga, BAY73-4506)<br>Drug: Nivolumab (Opdivo)                                                                                       | Recruiting             |

Abbreviations: PD-1: programmed cell death protein 1, PD-L1: programmed death-ligand 1, CTLA-4: (Cytotoxic T-Lymphocyte Associated Protein 4, IDO: indoleamine 2,3-dioxygenase, Tim-3: T cell immunoglobulin and mucin-domain containing-3, TIGIT: T cell immunoreceptor with Ig and ITIM domain, LAG-3: lymphocyte activation gene-3, TNFRSF9: tumor necrosis factor receptor superfamily member 9

**Supplementary Table 2:** Completed clinical trials of oncolytic virotherapy for the treatment of GBM.

| Virus       | Strain                  | Features                                                                                 | Phase | Route                                     | Trial Number           |
|-------------|-------------------------|------------------------------------------------------------------------------------------|-------|-------------------------------------------|------------------------|
| Adenovirus  | Onyx-015                | E1B-55kD deletion                                                                        | I     | -                                         | -                      |
|             | DNX-2401                |                                                                                          | I     | IT                                        | NCT00805376            |
|             | DNX-2401                |                                                                                          | I/II  | Intracerebral infusion by CED             | NCT01582516            |
|             | DNX-2401 + TMZ          | $\Delta$ 24 deletion in E1A RGD-4C fiber modification                                    | I     | IT followed by oral TMZ                   | NCT01956734 (Spain)    |
|             | DNX-2401 + IFN $\gamma$ |                                                                                          | Ib    | IT followed by IFN $\gamma$               | NCT02197169 (TARGET-I) |
| Herpesvirus | G207                    | $\gamma$ 34.5 and UL39 deletion                                                          | Ib/II | IT                                        | NCT00028158            |
|             |                         |                                                                                          | I     | IT followed by radiation                  | NCT00157703            |
|             | HSV 1716                | $\gamma$ 34.5 gene deletion                                                              | I     | IT                                        | (UK)                   |
|             |                         |                                                                                          | I     | IT                                        | (UK)                   |
|             |                         |                                                                                          | I     | IT                                        | (UK)                   |
|             | G47 $\Delta$            | $\gamma$ 34.5, UL39 and $\alpha$ 47 deletion. US11 expression under $\alpha$ 47 promoter | I/II  | IT                                        | UMIN00000266           |
|             |                         |                                                                                          | II    | IT                                        | UMIN000015995 (Japan)  |
| Measles     | MV-CEA                  | Attenuated expressing hCEA                                                               | I     | Injection into resection cavity and/or IT | NCT00390299            |
| Parvovirus  | ParvOryx                | Unmodified rat parvovirus                                                                | I/IIa | IT/IV followed by tumor resection         | NCT01301430            |
| Reovirus    | REOLYSIN                | Unmodified human reovirus (serotype 3)                                                   | I     | IT                                        | -                      |
|             |                         |                                                                                          | I/II  | IT                                        | NCT00528684            |
|             |                         |                                                                                          | I     | IV                                        | EudraCT 2011-005635-10 |
| Retrovirus  | Toca 511 +Toca FC       | Expressing CD gene                                                                       | I     | Injection into resection cavity           | NCT01470794            |
|             |                         |                                                                                          | I     | IT or IV                                  | NCT01156584            |
|             |                         |                                                                                          | I     | IV                                        | NCT01985256            |

Abbreviations: RGD: arginine-glycine-aspartic acid, CED: convection-enhanced delivery, IT: intratumorally, TMZ: temozolomide, IFN $\gamma$ : interferon gamma, CEA: carcinoembryonic antigen, IV: intravenously, CD: cytosine deaminase.

**Supplementary Table 3: Currently active and/or recruiting clinical trials of oncolytic virotherapy for the treatment of GBM**

| <b>Virus</b>       | <b>Strain</b>           | <b>Features</b>                                                                             | <b>Phase</b> | <b>Route</b>     | <b>Trial Number</b>                       |
|--------------------|-------------------------|---------------------------------------------------------------------------------------------|--------------|------------------|-------------------------------------------|
| <b>Adenovirus</b>  | DNX-2401                | Loaded onto allogeneic BM-hMSCs                                                             | I            | IA               | NCT03896568                               |
|                    | DNX2401+ pembrolizumab  |                                                                                             | II           | IT               | NCT02798406 (CAPTIVE)                     |
|                    | DNX-2440                | DNX-2401 expressing OX40L                                                                   | I            | IT               | NCT03714334                               |
|                    | NSC-CRAAd-S-pk7         | E1A under survivin promoter<br>Loaded onto NSCs                                             | I            | IT               | NCT03072134                               |
| <b>Herpesvirus</b> | C134                    | $\gamma$ 34.5 deletion<br>IRS1 expression under control of an HCMV immediate early promoter | I            | IT               | NCT03657576                               |
|                    | G207 +/- 5 Gy radiation | Deletion of both copies of $\gamma$ 34.5 gene<br>Inactivating lacZ insertion in UL39 gene   | I<br>I<br>II | IT<br>IT<br>IT   | NCT02457845<br>NCT03911388<br>NCT04482933 |
|                    | M032                    | Deletion of both copies of $\gamma$ 34.5 gene<br>Expressing human IL-12                     | I            | IT               | NCT02062827                               |
|                    | rQNestin34.5v2          | $\gamma$ 34.5 and UL39 deletion<br>$\gamma$ 34.5 expression under nestin promoter           | I            | IT +/- IV<br>CPA | NCT03152318                               |
|                    |                         |                                                                                             |              | I/Ib<br>Ib<br>II | IT<br>IT<br>IT                            |
| <b>Poliovirus</b>  | PVSRIPO                 | Attenuated poliovirus with IRES replaced by IRES from HRV2                                  |              |                  |                                           |
|                    | PVSRIPO+ pembrolizumab  |                                                                                             | II           | IT               | NCT04479241 (LUMINOS-101)                 |
| <b>Reovirus</b>    | REOLYSIN + rGM-CSF      | Unmodified human reovirus (serotype 3)                                                      | I            | IV               | NCT02444546                               |
| <b>Retrovirus</b>  | Toca 511 +Toca FC       | Expressing CD gene                                                                          | II/III       | IT               | NCT02414165                               |
| <b>Vaccinia</b>    | TG6002 + 5-FC           | Expressing FCU1<br>TK and RR gene deletion                                                  | I/II         | IV               | NCT03294486                               |

Abbreviations: BM-hMSCs: bone-marrow human mesenchymal stem cells, IA: intra-arterial, IT: intratumorally, OX40L: OX40 ligand, NSCs: neural stem cells, IRS1: insulin receptor substrate 1, HCMV: human cytomegalovirus, UL39: ribonucleotide reductase large subunit, IL-12: interleukin 12, IV: intravenously, CPA: cyclophosphamide, IRES: internal ribosome entry site, HRV2: human rhinovirus type 2, rGM-CSF: recombinant granulocyte-macrophage colony-stimulating factor, CD: cytosine deaminase, 5-FC: 5-fluorocytosine, FCU1: fusion suicide gene 1, TK: thymidine kinase, RR: ribonucleotide reductase.

**Supplementary Table 4:** Currently active and/or recruiting clinical trials of CAR-T cell therapy for the treatment of GBM

|    | Target Antigen                                                   | Estimated Enrolment | Status             | Phase | Trial Number |
|----|------------------------------------------------------------------|---------------------|--------------------|-------|--------------|
| 1  | GD2                                                              |                     | Withdrawn          | II    | NCT03252171  |
| 2  | EphA2                                                            |                     | Withdrawn          | II    | NCT02575261  |
| 3  | EGFR                                                             |                     | Unknown            | I     | NCT02331693  |
| 4  | GD2                                                              |                     | Withdrawn          | II    | NCT04406610  |
| 5  | EGFRVIII, IL13R $\alpha$ 2, Her-2, EphA2, CD133, GD2             | 100 participants    | Recruiting         | I     | NCT03423992  |
| 6  | GD2                                                              | 54 participants     | Recruiting         | I     | NCT04196413  |
| 7  | GD2-C7R                                                          | 34 participants     | Recruiting         | I     | NCT04099797  |
| 8  | B7-H3                                                            | 70 participants     | Recruiting         | I     | NCT04185038  |
| 9  | MUC1                                                             | 20 participants     | Unknown            | II    | NCT02617134  |
| 10 | CD147                                                            | 31 participants     | Recruiting         | I     | NCT04045847  |
| 11 | Chlorotoxin-Car T cells for MPP2 <sup>+</sup> Glioblastoma cells | 36 participants     | Recruiting         | I     | NCT04214392  |
| 12 | EGFRVIII                                                         | 18 participants     | Completed          | II    | NCT01454596  |
| 13 | EGFRVIII                                                         | 3 participants      | Terminated         | I     | NCT02664363  |
| 14 | NKG2D                                                            | 10 participants     | Not yet recruiting | I     | NCT04550663  |
| 15 | EGFR                                                             | 36 participants     | Recruiting         | I     | NCT03638167  |
| 16 | HER2                                                             | 48 participants     | Recruiting         | I     | NCT03500991  |
| 17 | EGFRVIII, DR5, NY-ESO-1, Mesothelin                              | 50 participants     | Recruiting         | II    | NCT03941626  |
| 18 | HER2                                                             |                     | Withdrawn          | II    | NCT02713984  |
| 19 | EGFRVIII                                                         | 73 participants     | Recruiting         | II    | NCT03638206  |
| 20 | EGFRVIII                                                         | 11 participants     | Terminated         | I     | NCT02209376  |
| 21 | IL13R $\alpha$ 2                                                 | 92 participants     | Recruiting         | I     | NCT02208362  |
| 22 | EGFRVIII                                                         | 24 participants     | Suspended          | I     | NCT03283631  |
| 23 | EGFRVIII                                                         | 20 participants     | Unknown            | I     | NCT02844062  |
| 24 | NKG2D                                                            |                     | Withdrawn          | I     | NCT04270461  |
| 25 | HER2                                                             | 42 participants     | Recruiting         | I     | NCT03389230  |
| 26 | IL13R $\alpha$ 2                                                 | 30 participants     | Recruiting         | I     | NCT04661384  |
| 27 | IL13R $\alpha$ 2                                                 | 60 participants     | Recruiting         | I     | NCT04003649  |
| 28 | EGFRVIII                                                         | 7 participants      | Completed          | I     | NCT03726515  |
| 29 | PD-L1                                                            | 20 participants     | Unknown            | I     | NCT02937844  |
| 30 | NKG2D                                                            | 20 participants     | Not yet recruiting |       | NCT0471799   |
| 31 | B7-H3                                                            | 40 participants     | Recruiting         | II    | NCT04077866  |
| 32 | B7-H3                                                            | 12 participants     | Recruiting         | I     | NCT04385173  |
| 33 | HER2                                                             | 16 participants     | Completed          | I     | NCT01109095  |

Abbreviations: GD2: disialoganglioside, EphA2: erythropoietin-producing hepatocellular carcinoma A2, CLTX: chlorotoxin, NKG2DLs: natural killer group 2D ligands, CSPG4: chondroitin sulfate proteoglycan 4, CAIX: carbonic anhydrase IX, and integrin  $\alpha\beta$ 3, EGFR: epidermal growth factor receptor, EGFRVIII: EGFR variant III, IL13R $\alpha$ 2: interleukin-13 receptor subunit alpha-2, Her-2: human epidermal growth factor receptor 2, MUC1: mucin 1, MMP2: multipotent progenitor 2, DR5: death receptor 5, NY-ESO-1: New York esophageal squamous cell carcinoma 1, PD-L1: programmed death-ligand 1
